# Supplementary material for: Bidentate ligands formed by self-assemblyElectronic supplementary information (ESI) available: ligand synthesis and detailed experimental data. See http://www.rsc.org/suppdata/cc/b3/b306683e/
Source: Royal Society of Chemistry journal article supplement (doi:10.1039/b306683e), 2003-01-01
Supplement: b306683e.doc [file b306683e.doc]

### Supplementary material

**General Procedures.** Unless stated otherwise, reactions were carried out under an atmosphere of argon using standard Schlenk techniques. THF, hexane and diethyl ether were distilled from sodium benzophenone ketyl; CH2Cl2, isopropanol and methanol were distilled from CaH2 and toluene was distilled from sodium under nitrogen. NMR spectra (1H, 31P and 13C) were measured on a Bruker DRX 300 MHz and Varian Mercury 300 MHz; CDCl3 was used as a solvent, if not further specified. Mass spectra were recorded on a JEOL JMS SX/SX102A four sector mass spectrometer; for FAB-MS 3-nitrobenzyl alcohol was used as matrix. Elemental analyses were obtained on an Elementar Vario EL apparatus. UV-vis spectroscopy experiments were performed on a HP 8453 UV/Visible System. Gas chromatographic analyses were run on an Interscience HR GC Mega 2 apparatus (split/splitless injector, J&W Scientific, DB-1 J&W 30 m column, film thickness 3.0 μm, carrier gas 70kPa He, FID Detector) equipped with a Hewlett-Packard Data system (Chrom-Card). Chiral GC separations were conducted with a chirasil-L-Val capillary column (0.25 mm x 25 m).

**Materials.** With exception of the compounds given below, all reagents were purchased from commercial suppliers and used without further purification. Diisopropylethylamine and triethylamine were distilled from CaH2 under argon. The following compound were synthesized according to published procedures: 5,10,15,20-tetrakis-phenyl zinc(II) porphyrin **1**,[[1]](#endnote-2) a simple fast route for the synthesis of 5-(4-hydroxyphenyl)-10,15,20-tri(phenyl) porphyrin[[2]](#endnote-3) is reported below, bisporphyrin **2**[[3]](#endnote-4) and pyridylphosphine **b**.[[4]](#endnote-5)

*Synthesis of 5-(4-hydroxyphenyl)-10,15,20-tris(phenyl) porphyrin*

4-hydroxybenzaldehyde (12.7 g, 104 mmol) and benzaldehyde (31.6 ml, 312 mmol) were dissolved in 1.0 l of propionic acid and heated till reflux. Under an air flow and vigorous stirring pyrrole (28.9 ml, 416 mmol) was cautiously added and the solution was refluxed for 1 hour. The reaction mixture was cooled to 60°C and 150 ml of methanol was added. The reaction was stored overnight at 4°C, allowing the porphyrin to precipitate. The reaction mixture was filterted and washed several times with methanol until the filtrate was colorless. The porphyrin was purified using column chromatography (basic alumina, CH2Cl2, upgrade 3% MeOH in CH2Cl2 and 5% MeOH in CH2Cl2), giving 5-(4-hydroxyphenyl)-10,15,20-tris(phenyl) porphyrin (1.87 g, 2.96 mmol, 2.8%).

*Bis porphyrin* ***2***

This compound was prepared using a slightly different method as that reported by Nolte.Error: Reference source not foundTo a solution of 5-(4-hydroxyphenyl)-10,15,20-tris(phenyl) porphyrin (1.37 g, 2.17 mmol) in 40 ml of freshly distilled DMF was added 229 mg (0.869 mmol) of ,’-dibromo-*ortho*-xylene, 1.0 g of K2CO3 and 1.0 g of NaI The mixture was stirred overnight at 120 C. The crude product mixture was filtered and subsequently extracted with CH2Cl2 washed twice with 1N HCl and water. The product was dried over Na2SO4 and after evaporation of the solvent the resulting product was purified by flash chromatography (basic alumina, eluent, CH2Cl2). A red solid was obtained in 63 % yield. 1H NMR (300 MHz):  8.88 (m, 12H), 8.81 (d, 2H, J = 4.8Hz), 8.72 (d, 2H, J = 4.8Hz), 8.25 (m, 4H), 8.13 (d, 4H, J = 8.4Hz), 8.04 (d, 8H, J = 7.8Hz), 7.80-7.70 (m, 6H), 7.68-7.51 (m, 12H), 7.33 (d, 4H, J =8.7 Hz), 7.28 (m, 2H), 7.19 (m, 2H), 5.44 (s, 4H); HRMS (FAB+): m/z calcd. for C96H67N8O2 ([MH+]): 1363.53.; obsd.: 1362.9309; anal. calcd. for C96H66N8O2: C, 84.56; H, 4.88; N, 8.22. Found: C, 84.32; H, 4.84; N, 8.12.

*Synthesis of (S)-(1,1’-binaphthyl-2,2’-diyl)-(3-pyridyl) phosphite* **c**

3-Hydroxypyridine (1.44 g, 15.1 mmol), azeotropically dried with toluene (3x5 ml), and triethylamine (2.3 ml, 16.6 mmol) were dissolved in THF (40 ml) and the solution was cooled to –40 C. Freshly prepared (S)-2,2’-binaphtol phosphorochloridite (5.3 g, 15.1 mmol) was dissolved in THF (20 ml) and added dropwise. The cooling bath was removed and the solution was allowed to warm to room temperature, stirring was continued for 1 hour. The reaction mixture was filtered and the solvent evaporated. A mixture of toluene/hexane 1/3 (40 ml) was added to extract the product. After filtration the solvent was removed in *vacuo*, giving **c** (5.4 g, 13.2 mmol, 87 %) as a white solid: 1H NMR (300 MHz):  8.54 (d, 1H, J = 2.4Hz), 8.40 (d, 1H, J = 4.2Hz), 8.02 (d, 1H, J = 8.7Hz), 7.95 (d, 1H, J = 8.7Hz), 7.92 (d, 2H, J = 8.7Hz), 7.56-7.16 (m, 10H); 31P NMR (121.5 MHz):  143.05; 13C (75.465 MHz): 148.88 (d, Jcp = 6.1Hz), 147.52 (d, Jcp = 4.8Hz), 146.84 (d, Jcp = 1,4Hz), 145.80 (s), 142.71 (d, Jcp = 7.3Hz), 133.02 (s), 132.75 (s), 132.01(s), 131.55 (s), 130.97 (s), 130.36 (s), 129.29 (s), 128.67 (d, Jcp = 4.8Hz), 128.48 (s), 127.945 (s), 127.83 (s), 127.28 (s), 127.19 (s), 126.80 (s), 126.67 (s), 125.68 (s), 125.49 (s), 124.49 (s) 121.77 (s), 121.59 (s). HRMS (FAB+): m/z calcd. for C25H17NO3P ([MH+]): 410.0946; obsd.: 410.0952; anal. calcd. for C25H16NO3P: C, 73.35; H, 3.94; N, 3.42. Found: C, 73.20; H, 4.16; N, 3.25.

*Synthesis of (R)-(1,1’-binaphthyl-2,2’-diyl)-(3-pyridyl)phosphite* **d**

This compound was prepared as described for **c**, using 5-(3-hydroxyphenyl)-10,15,20-tris(phenyl)-zinc(II) porphyrin and freshly prepared (R)-2,2’-binaphtol phosphorochloridite. Yield (78 %) as a purple-red solid: 1H NMR (300 MHz):  8.54 (d, 1H, J = 2.4Hz), 8.40 (d, 1H, J = 4.2Hz), 8.02 (d, 1H, J = 8.7Hz), 7.95 (d, 1H, J = 8.7Hz), 7.92 (d, 2H, J = 8.7Hz), 7.56-7.16 (m, 10H); 31P NMR (121.5 MHz):  143.05; 13C-ATP (75.465 MHz): 148.88 (d, Jcp = 6.1Hz), 147.52 (d, Jcp = 4.8Hz), 146.84 (d, Jcp = 1,4Hz), 145.80 (s), 142.71 (d, Jcp = 7.3Hz), 133.02 (s), 132.75 (s), 132.01(s), 131.55 (s), 130.97 (s), 130.36 (s), 129.29 (s), 128.67 (d, Jcp = 4.8Hz), 128.48 (s), 127.945 (s), 127.83 (s), 127.28 (s), 127.19 (s), 126.80 (s), 126.67 (s), 125.68 (s), 125.49 (s), 124.49 (s) 121.77 (s), 121.59 (s). HRMS (FAB+): m/z calcd. for C25H17NO3P ([MH+]): 410.0946; obsd.: 410.0938; anal. calcd. for C25H16NO3P: C, 73.35; H, 3.94; N, 3.42. Found: C, 73.64; H, 4.38; N, 3.05.

**Catalysis**

*The hydroformylation experiments were performed as follows.*[[5]](#endnote-6) A stainless steel 25 ml autoclave, equipped with a teflon stirring bar, was charged with 0.42 µmol of [Rh(acac)(CO)2] (80 C) and [HRh(PPh3)3(CO)] (25 C), 10.4 µmol of phosphine and 0.017 ml of dipea in 4.0 ml of toluene. The solution was incubated for 1 under 20 bar CO/H2 (1:1). The pressure was reduced to 1 bar and a mixture of 0.34 ml 1-octene (styrene) and 0.17 ml of decane in 0.67 ml of toluene was added. Subsequently the CO/H2 pressure was repressurized to 20 bar. The mixture was stirred at for 2 hours (80 C) and 43 hours (25 C). Then the autoclave was cooled down to 0 C in an ice bath and the pressure was reduced to 1.0 bar. The samples withdrawn from the autoclave were analyzed by GC. A sample was taken and the conversion was checked by GC measurement of the crude product after filtration over a plug silica to remove the catalyst. The crude product mixture of styrene was subjected to reduction with NaBH4 by stirring in 5.0 ml methanol for 30 minutes. Quenching with water, extraction with a solution of ethyl acetate/hexane = 1/1, drying of the organic layer, filtrations and removal of solvent gave the corresponding alcohols, for which the enantiomeric purities were determined by chiral GC (Cyclosil-B, isothermal; T = 90 C, tR (R)= 63.5 min. and tS (S) = 64.8 min.).

*The allylic alkylation experiments were performed as follows.* Under Schlenk conditions 0.50 µmol of [Pd(allyl)Cl]2, 3.0 µmol phosphite and 3.0 µmol phosphine were dissolved in 5.0 ml of CH2Cl2 and stirred for 30 minutes. Respectively, 50 µmol 1,3-diphenyl-allyl acetate, 150 µmol dimethylmalonate, 150 µmol BSA and 50 µmol decane and a pinch of KOAc were added. The mixture was stirred for 64 hours at 25 C and subsequently stopped by adding a saturated ammonium chloride solution of water. Subsequently, 5.0 ml of petroleum ether was added and the solution was washed once more with a saturated NH4Cl solution. The organic phase was dried over Na2SO4, filtered and the conversion was checked by GC measurement. The solution was chromatographed (SiO2; petroleum ether/CH2Cl2 = 1/1) to give analytically pure products.[[6]](#endnote-7) Enantiomeric purities were determined by chiral HPLC (OD column, eluens 0.5 % isopropanol in hexane tR (R)= 33.2 min. and tS (S) = 34.9 min.).

**High-pressure NMR-experiments**[[7]](#endnote-8)

In a typical experiment the high pressure NMR tube was filled with (30 µmol) of [Rh(acac)(CO)2], (75 µmol) of phosphite zinc(II) porphyrin, (75 µmol) phosphine and 1.5 ml of toluene-d8. The tube was purged three times with 15 bar of CO/H2 (1:1), pressurized to approximately 20 bar, heated to 80C and incubated for 1 hour. Measurements were performed at 25C.

1. Synthesized using the method by; A. D. Adler, F. R. Longo, J. D. Finarelli, J. Goldmacher, J. Assour, and L. Korsakoff, *J. Org. Chem.*,1967, **32**, 476; A. D. Adler, F. R. Longo, F. Kampas and J. Kim, *J. Inorg. Nucl. Chem.*, 1970, **32**, 2443; J. B. Cooper, C. T. Brewer and G. Brewer, *Inorg. Chim. Acta*, 1987, **129**, 25. [↑](#endnote-ref-2)
2. D. Monti, M. Venanzi, G. Mancini, F. Marotti, L. La Monica and T. Boschi, *Eur. J. Org. Chem.*,1999, **8**, 1901. [↑](#endnote-ref-3)
3. H. A. M. Biemans, A. E. Rowan, A. Verhoeven, P. Vanoppen, L. Latterini, J. Foekema, A. P. H. J. Schenning, E. W. Meijer, F. C. De Schryver and R. J. M. Nolte, *J. Am. Chem. Soc.*, 1998, **120**, 11054. [↑](#endnote-ref-4)
4. A. Buhling, P. C. J. Kamer and P. W. N. M. van Leeuwen, *J. Mol. Catal. A*, 1995, **98**, 69. [↑](#endnote-ref-5)
5. L. A. van der Veen, P. H. Keeven, G. C. Schoemaker, J. N. H. Reek, P. C. J. Kamer, P. W. N. M. van Leeuwen, M. Lutz and A. L. Spek, *Organometallics*, 2000, **19**, 872. [↑](#endnote-ref-6)
6. Product characterization is in agreement with those reported in literature, see for example: (a) von Matt, P.; Loiseleur, O.; Koch, G.; Pfaltz, A.; Lefeber, C.; Feucht, T.; Helmchen, G*. Tetrahedron Asymmetry* **1994**, *5*, 573. (b) Bower, J. F.; Jumnah, R.; Williams, A. C.; Williams, J. M. J. *J. Chem. Soc., Perkin Trans 1* **1997**, 1411. [↑](#endnote-ref-7)
7. C. Bianchini, H. M. Lee, A. Meli and F. Vizza, *Organometallics*, 2000, **19**, 849; F. R. Bregman, J. M. Ernsting, F. Muller, M. D. K. Boele, L. A. van der Veen and C. J. Elsevier, *J. Organometal. Chem.*,1999, **592**, 306. [↑](#endnote-ref-8)
